# Supplementary material for: Lumican Inhibits Osteoclastogenesis and Bone Resorption by Suppressing Akt Activity
Source: MDPI journal article supplement (doi:10.3390/ijms22094717), 2021-04-29
Supplement: s1 [file s1]

A

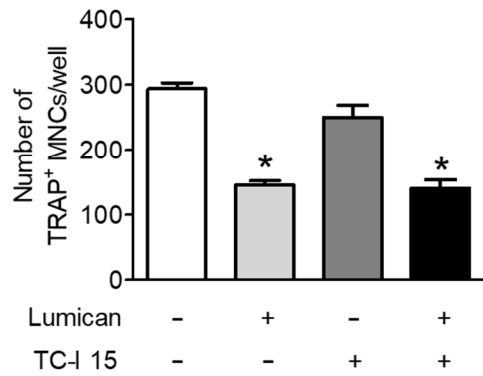

B

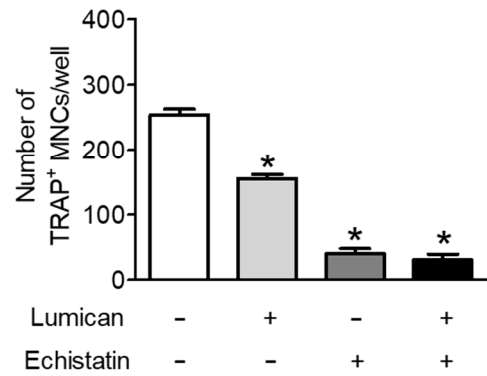

**Supplemental Figure 1.** The effect of lumican on osteoclastogenesis is not reversed by the inhibitors of integrin  $\alpha 2\beta 1$  or  $\alpha V\beta 3$ . (A and B) Primary mouse BMMs were treated with 30 ng/mL RANKL, 30 ng/mL M-CSF, 10 nM lumican, and (A) 1  $\mu$ M TC-I 15 (integrin  $\alpha 2\beta 1$  inhibitor) or (B) 10 nM echistatin (integrin  $\alpha V\beta 3$  inhibitor) for 4 days. The cells were then stained with TRAP, and the number of TRAP-positive multinucleated cells (MNCs) ( $\geq 3$  nuclei/cell) was determined to assess osteoclast differentiation ( $n = 3$ ). Data are presented as the mean  $\pm$  SEM. \* $P < 0.05$  vs. untreated control.
